# Supplementary material for: Fluid–rock interactions in the shallow Mariana forearc: carbon cycling and redox conditions
Source: Copernicus journal article supplement (doi:10.5194/se-10-907-2019), 2019-06-24
Supplement: Supplementary file [file se-10-907-2019-supplement-title-page.pdf › se-10-907-2019-supplement-title-page.pdf]

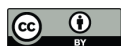

## *Supplement of*

# **Fluid–rock interactions in the shallow Mariana forearc: carbon cycling and redox conditions**

**Elmar Albers et al.**

*Correspondence to:* Elmar Albers (e.albers@uni-bremen.de)

- se-10-907-2019-supplement-title-page.pdf
- \_albers+2019-SolidEarth\_SI\_vFINAL.docx
- figS1\_\_serpentine\_textures\_OPT.pdf
- figS2\_\_deep\_carbonate\_REEs.pdf

The copyright of individual parts of the supplement might differ from the CC BY 4.0 License.
