# Supplementary figures and images for: Fluid–rock interactions in the shallow Mariana forearc: carbon cycling and redox conditions
Source: Copernicus journal article supplement (doi:10.5194/se-10-907-2019), 2019-06-24

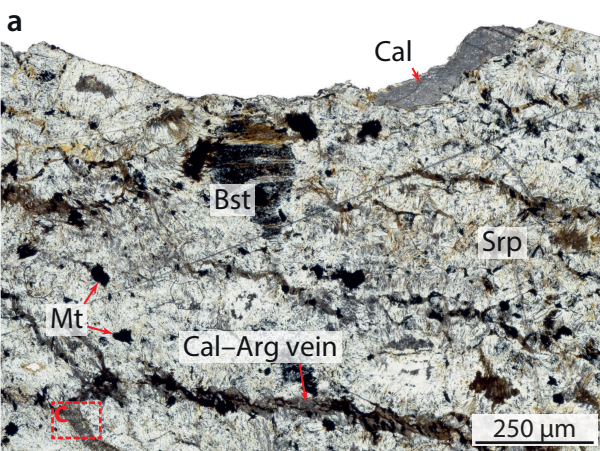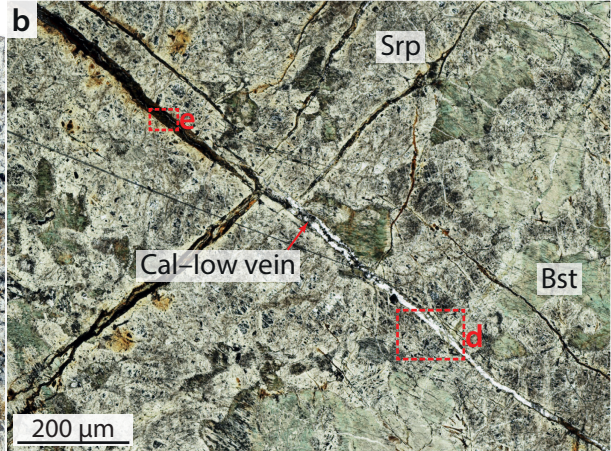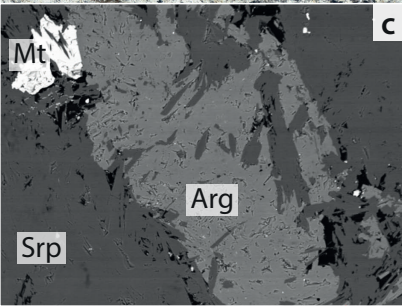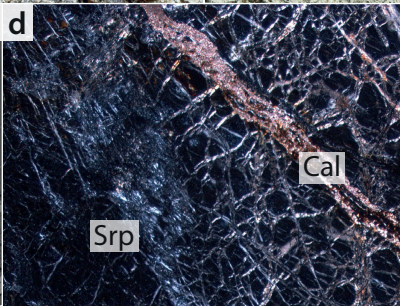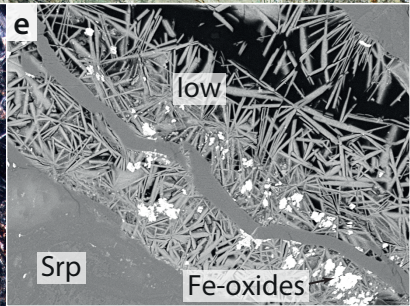

Supplement: Supplementary file 1 [file figS1__serpentinite_textures_OPT.pdf › figS1__serpentinite_textures_OPT.pdf]

Sample/chondrite

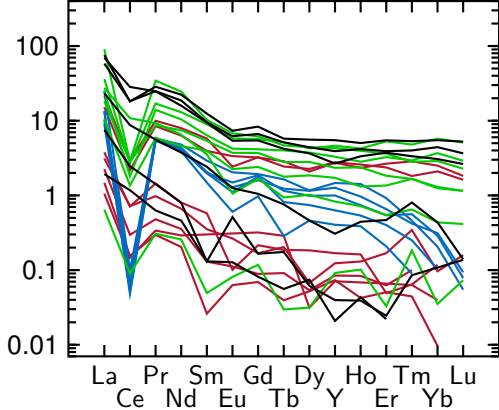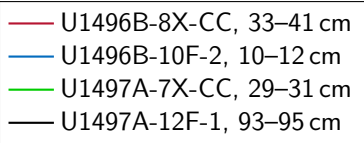

Supplement: Supplementary file 2 [file figS2__deep_carbonate_REEs.pdf › figS2__deep_carbonate_REEs.pdf]
